# Supplementary material for: Radiotherapy for Locally Advanced Pancreatic Adenocarcinoma—A Critical Review of Randomised Trials
Source: MDPI journal article supplement (doi:10.3390/curroncol30070499), 2023-07-18
Supplement: s1 [file s1]

**Supplementary A:**

| #  | Searches                                                                                                                                                                                                                                                                                                                                                                                                                                                                                   | Results |
|----|--------------------------------------------------------------------------------------------------------------------------------------------------------------------------------------------------------------------------------------------------------------------------------------------------------------------------------------------------------------------------------------------------------------------------------------------------------------------------------------------|---------|
| 1  | exp pancreas adenocarcinoma/                                                                                                                                                                                                                                                                                                                                                                                                                                                               | 41169   |
| 2  | (Pancrea* adj3 (adenocarcinoma or adeno-carcinoma or ductal carcinoma or duct adenocarcinoma or duct carcinoma or ductal adenocarcinoma or ductal carcinoma or duct carcinogenesis or duct carcinoma or duct cell adenocarcinoma or duct cell carcinoma or ductal adenocarcinoma)).mp. [mp=title, abstract, heading word, drug trade name, original title, device manufacturer, drug manufacturer, device trade name, keyword heading word, floating subheading word, candidate term word] | 52096   |
| 3  | 1 or 2                                                                                                                                                                                                                                                                                                                                                                                                                                                                                     | 52096   |
| 4  | (Pancrea* adj3 (adenocarcinoma or adeno-carcinoma or ductal carcinoma or duct adenocarcinoma or duct carcinoma or ductal adenocarcinoma or ductal carcinoma or duct carcinogenesis or duct carcinoma or duct cell adenocarcinoma or duct cell carcinoma or ductal adenocarcinoma)).ti,ab,kf.                                                                                                                                                                                               | 41177   |
| 5  | radiotherapy/                                                                                                                                                                                                                                                                                                                                                                                                                                                                              | 208083  |
| 6  | stereotactic radiosurgery/ or stereotactic body radiation therapy/                                                                                                                                                                                                                                                                                                                                                                                                                         | 33129   |
| 7  | (radiotherap* or stereotactic radiosurg* or stereotactic body radiation therap*).mp. [mp=title, abstract, heading word, drug trade name, original title, device manufacturer, drug manufacturer, device trade name, keyword heading word, floating subheading word, candidate term word]                                                                                                                                                                                                   | 749221  |
| 8  | 5 or 6 or 7                                                                                                                                                                                                                                                                                                                                                                                                                                                                                | 749221  |
| 9  | 3 and 8                                                                                                                                                                                                                                                                                                                                                                                                                                                                                    | 5501    |
| 10 | (radiotherap* or stereotactic radiosurg* or stereotactic body radiation therap*).ti,ab,kf.                                                                                                                                                                                                                                                                                                                                                                                                 | 362197  |
| 11 | 5 or 6 or 10                                                                                                                                                                                                                                                                                                                                                                                                                                                                               | 457579  |
| 12 | 1 or 4                                                                                                                                                                                                                                                                                                                                                                                                                                                                                     | 51859   |
| 13 | 11 and 12                                                                                                                                                                                                                                                                                                                                                                                                                                                                                  | 2867    |
| 14 | limit 13 to (books or chapter or conference abstract or conference paper or "conference review")                                                                                                                                                                                                                                                                                                                                                                                           | 1343    |
| 15 | 13 not 14                                                                                                                                                                                                                                                                                                                                                                                                                                                                                  | 1524    |
